# Supplementary material for: A multicentre study to determine the in vitro efficacy of flomoxef against extended-spectrum beta-lactamase producing Escherichia coli in Malaysia
Source: PeerJ. 2023 Nov 28;11:e16393. doi: 10.7717/peerj.16393 (PMC10691355; doi:10.7717/peerj.16393)
Supplement: Supplemental Information 1 [file peerj-11-16393-s001.xlsx]

## Sheet: PCR primers
Table 1. Primers information
Target gene	Primer sequence 5'-3'	Amplicon size (bp)	Reference
AmpC/FOX	CTACAGTGCGGGTGGTTT	162	Dallenne, C., Da Costa, A., Decre, D., Favier, C., & Arlet, G. (2010). Development of a set of multiplex PCR assays for the detection of genes encoding important beta-lactamases in Enterobacteriaceae. J Antimicrob Chemother, 65(3), 490-495. doi: 10.1093/jac/dkp498
	CTATTTGCGGCCAGGTGA
OXA-48	TTG GTG GCA TCG ATT ATC GG	744	Poirel, L., Héritier, C., Tolün, V., & Nordmann, P. (2004). Emergence of oxacillinase-mediated resistance to imipenem in Klebsiella pneumoniae. Antimicrobial agents and chemotherapy, 48(1), 15-22.
	GAG CAC TTC TTT TGT GAT GGC
NDM	GGT TTG GCG ATC TGG TTT TC	621	Nordmann, P., Naas, T., & Poirel, L. (2011). Global spread of carbapenemase-producing Enterobacteriaceae. Emerging infectious diseases, 17(10), 1791.
	CGG AAT GGC TCA TCA CGA TC
VIM	GAT GGT GTT TGG TCG CAT A	390	Nordmann, P., Naas, T., & Poirel, L. (2011). Global spread of carbapenemase-producing Enterobacteriaceae. Emerging infectious diseases, 17(10), 1791.
	CGA ATG CGC AGC ACC AG
IMP	GGA ATA GAG TGG CTT AAY TC	232	Nordmann, P., Naas, T., & Poirel, L. (2011). Global spread of carbapenemase-producing Enterobacteriaceae. Emerging infectious diseases, 17(10), 1791.
	TCG GTT TAA YAA AAC AAC CAC C
KPC	CTGTCTTGTCTCTCATGGCC	862	Naas, T., Cuzon, G., Villegas, M. V., Lartigue, M. F., Quinn, J. P., & Nordmann, P. (2008). Genetic structures at the origin of acquisition of the β-lactamase blaKPC gene. Antimicrobial agents and chemotherapy, 52(4), 1257-1263.
	CCTCGCTGTGCTTGTCATCC
SHV	AGC CGC TTG AGC AAA TTA AAC	713	Dallenne, C., Da Costa, A., Decré, D., Favier, C., & Arlet, G. (2010). Development of a set of multiplex PCR assays for the detection of genes encoding important β-lactamases in Enterobacteriaceae. Journal of Antimicrobial Chemotherapy, 65(3), 490-495.
	ATC CCG CAG ATA AAT CAC CAC
TEM	CAT TTC CGT GTC GCC CTT ATT C	800	Dallenne, C., Da Costa, A., Decré, D., Favier, C., & Arlet, G. (2010). Development of a set of multiplex PCR assays for the detection of genes encoding important β-lactamases in Enterobacteriaceae. Journal of Antimicrobial Chemotherapy, 65(3), 490-495.
	CGT TCA TCC ATA GTT GCC TGA C
CTXM-1	GGT TAA AAA ATC ACT GCG TC	864	Eckert, C., Gautier, V., Saladin-Allard, M., Hidri, N., Verdet, C., Ould-Hocine, Z., . . . Lambert, T. (2004). Dissemination of CTX-M-type β-lactamases among clinical isolates of Enterobacteriaceae in Paris, France. Antimicrobial Agents and Chemotherapy, 48(4), 1249-1255.
	TTG GTG ACG ATT TTA GCC GC

## Sheet: Phenotypic & genotypic data
Table 2. Phenotypic and genotypic distribution of the ESBL-EC.
No.	Study ID	Site	Phenotype															Genotype
			CPD10	CRO30	CIP5	ETP10	AMC	TZP	FOX	CAZ	CTX	FEP	FLO	ATM	IPM	MEM	SXT	ampC	OXA-48	TEM	CTXM-1	NDM	VIM	IMP	KPC	SHV
1	UPM/EC/01	HS	R	R	R	S	R	I	S	R	R	R	S	R	I	S	R	-	-	+	+	-	-	-	-	-		Key
2	UPM/EC/02	HS	R	R	R	S	R	R	R	R	R	R	R	R	R	S	R	-	-	+	-	-	-	-	-	-		R	Resistant
3	UPM/EC/03	HS	R	R	R	S	S	R	R	R	R	R	S	R	I	S	R	-	-	-	-	-	-	-	-	-		I	Intermediate
4	UPM/EC/04	HS	R	R	S	S	R	R	S	R	R	R	S	R	S	S	R	-	-	+	+	-	-	-	-	-		S	Susceptible
5	UPM/EC/05	HS	R	R	I	S	R	R	S	I	R	R	S	R	I	S	R	-	-	+	-	-	-	-	-	-		-	Absent
6	UPM/EC/12	HS	R	R	S	S	R	R	R	R	R	R	S	R	S	S	R	-	-	+	-	-	-	-	-	-		+	Present
7	UPM/EC/13	HS	R	R	R	S	R	R	I	R	R	R	S	R	S	S	R	-	-	+	-	-	-	-	-	-		CPD10	Cefpodoxime (10μg)
8	USM/EC/01	HUSM	R	R	S	S	I	R	R	R	R	R	I	R	S	S	R	-	-	-	+	-	-	-	-	-		CRO30	Ceftriaxone (30μg)
9	USM/EC/02	HUSM	R	R	S	S	I	R	S	R	R	R	S	R	I	I	R	-	-	-	-	-	-	-	-	-		CIP5	Ciprofloxacin (5μg)
10	USM/EC/03	HUSM	R	R	R	S	R	R	I	S	R	R	S	R	S	S	R	-	-	+	-	-	-	-	-	-		ETP10	Ertapenem (10μg)
11	USM/EC/04	HUSM	R	R	R	S	R	R	I	R	R	R	S	R	S	S	R	-	-	+	+	-	-	-	-	-		AMC	Amoxicillin-clavulanate
12	USM/EC/05	HUSM	R	R	R	S	R	R	I	R	R	R	S	R	I	S	R	-	-	+	+	-	-	-	-	-		ATM	Aztreonam
13	USM/EC/06	HUSM	R	R	S	S	S	I	S	R	R	R	S	R	S	S	R	-	-	-	+	-	-	-	-	-		FEP	Cefepime
14	USM/EC/07	HUSM	R	R	S	S	I	R	S	R	R	R	S	R	S	S	R	-	-	-	+	-	-	-	-	-		CTX	Cefotaxime
15	USM/EC/08	HUSM	R	R	S	S	S	R	S	I	R	R	S	R	S	S	R	-	-	-	-	-	-	-	-	-		FOX	Cefoxitin
16	USM/EC/09	HUSM	R	R	S	S	S	R	S	I	R	R	S	R	S	S	R	-	-	+	+	-	-	-	-	-		CAZ	Ceftazidime
17	USM/EC/10	HUSM	R	R	S	S	R	R	S	R	R	R	S	R	S	S	R	-	-	+	+	-	-	-	-	-		FLO	Flomoxef
18	USM/EC/11	HUSM	R	R	I	S	R	R	I	R	R	R	S	R	S	S	R	-	-	+	+	-	-	-	-	-		IPM	Imipenem
19	USM/EC/12	HUSM	R	R	R	S	S	I	S	R	R	R	S	R	S	S	R	-	-	-	+	-	-	-	-	-		MEM	Meropenem
20	USM/EC/13	HUSM	R	R	I	S	I	I	S	I	R	R	S	R	S	S	R	-	-	+	-	-	-	-	-	-		TZP	Piperacillin-tazobactam
21	USM/EC/14	HUSM	R	R	R	S	I	S	S	R	R	R	S	R	S	S	R	-	-	-	+	-	-	-	-	-		SXT	Trimethoprim-sulfamethoxazole
22	USM/EC/15	HUSM	R	R	I	S	I	R	S	R	R	R	S	R	S	S	R	-	-	+	-	-	-	-	-	-
23	USM/EC/16	HUSM	R	R	S	S	R	R	I	I	R	R	S	R	S	S	R	-	-	-	+	-	-	-	-	-
24	USM/EC/17	HUSM	R	R	S	S	I	S	S	R	R	R	S	R	S	S	R	-	-	+	+	-	-	-	-	-
25	USM/EC/18	HUSM	R	R	I	S	S	I	R	R	R	R	S	R	S	S	R	-	-	-	-	-	-	-	-	-
26	USM/EC/19	HUSM	R	R	R	S	S	I	R	R	R	R	S	R	S	S	R	-	-	-	-	-	-	-	-	-
27	USM/EC/22	HUSM	R	R	R	S	R	R	R	R	R	R	S	R	S	S	R	-	-	-	+	-	-	-	-	+
28	USM/EC/23	HUSM	R	R	R	S	I	R	R	R	R	R	S	R	S	S	R	-	-	+	+	-	-	-	-	+
29	USM/EC/24	HUSM	R	R	R	S	R	R	R	R	R	R	S	R	S	S	R	-	-	+	+	-	-	-	-	+
30	USM/EC/25	HUSM	R	R	R	S	R	R	R	R	R	R	S	R	S	S	R	-	-	+	+	-	-	-	-	+
31	USM/EC/26	HUSM	R	R	S	S	R	R	R	R	R	R	S	R	S	S	R	-	-	-	-	-	-	-	-	+
32	USM/EC/27	HUSM	R	R	S	S	S	I	R	R	R	R	S	R	S	S	R	-	-	-	+	-	-	-	-	+
33	USM/EC/28	HUSM	R	R	R	S	R	R	I	R	R	R	S	R	S	S	R	-	-	+	+	-	-	-	-	+
34	USM/EC/29	HUSM	R	R	R	S	S	R	R	R	R	R	S	R	S	S	R	-	-	-	-	-	-	-	-	+
35	USM/EC/30	HUSM	R	R	R	S	I	I	I	R	R	R	S	R	S	S	R	-	-	-	-	-	-	-	-	+
36	USM/EC/31	HUSM	R	R	R	S	S	R	I	R	R	R	S	R	S	S	R	-	-	+	+	-	-	-	-	+
37	USM/EC/32	HUSM	R	R	S	S	R	I	S	R	R	R	S	R	S	S	R	-	-	+	+	-	-	-	-	+
38	USM/EC/33	HUSM	R	R	S	S	S	I	S	S	R	R	S	R	S	S	R	-	-	-	+	-	-	-	-	+
39	USM/EC/34	HUSM	R	R	R	S	R	R	R	R	R	R	S	R	S	S	R	-	-	-	+	-	-	-	-	+
40	USM/EC/35	HUSM	R	R	R	S	S	S	R	R	R	R	S	R	S	S	R	-	-	+	+	-	-	-	-	+
41	USM/EC/36	HUSM	R	R	R	S	S	R	R	R	R	R	S	R	S	S	R	-	-	-	+	-	-	-	-	+
42	USM/EC/37	HUSM	R	R	R	S	R	R	R	R	R	R	R	R	S	S	R	-	-	-	+	-	-	-	-	+
43	USM/EC/38	HUSM	R	R	R	S	I	R	S	R	R	R	S	R	S	S	R	-	-	-	+	-	-	-	-	+
44	USM/EC/39	HUSM	R	R	S	S	R	R	I	R	R	R	S	R	S	S	R	-	-	+	+	-	-	-	-	+
45	USM/EC/40	HUSM	R	R	R	S	R	R	S	R	R	R	S	R	S	S	R	-	-	+	+	-	-	-	-	+
46	USM/EC/41	HUSM	R	R	S	S	I	R	I	R	R	R	S	R	S	S	R	-	-	+	-	-	-	-	-	-
47	USM/EC/42	HUSM	R	R	S	S	S	I	S	R	R	R	S	R	S	S	R	-	-	+	+	-	-	-	-	-
48	UKM/EC/01	HCTM UKM	R	R	S	S	R	R	S	R	R	R	S	R	S	S	R	-	-	+	+	-	-	-	-	-
49	UKM/EC/02	HCTM UKM	R	R	R	S	R	R	I	R	R	R	S	R	S	S	R	-	-	+	+	-	-	-	-	-
50	UKM/EC/03	HCTM UKM	R	R	I	S	S	I	S	R	R	R	S	R	S	S	R	-	-	-	+	-	-	-	-	-
51	UKM/EC/04	HCTM UKM	R	R	S	S	I	R	I	S	R	R	I	R	S	S	R	-	-	-	-	-	-	-	-	-
52	UKM/EC/05	HCTM UKM	R	R	R	S	R	R	I	R	R	R	I	R	S	S	R	-	-	+	-	-	-	-	-	-
53	UKM/EC/06	HCTM UKM	R	R	S	S	S	I	S	R	R	R	S	R	S	S	R	-	-	-	+	-	-	-	-	-
54	UKM/EC/07	HCTM UKM	R	R	S	S	I	R	S	R	R	R	I	R	S	S	R	-	-	-	-	-	-	-	-	-
55	UKM/EC/08	HCTM UKM	R	R	R	S	S	I	S	R	R	R	S	R	I	S	R	-	-	-	+	-	-	-	-	-
56	UKM/EC/09	HCTM UKM	R	R	R	S	I	R	S	R	R	R	S	R	S	I	R	-	-	+	-	-	-	-	-	-
57	UKM/EC/10	HCTM UKM	R	R	R	S	I	R	I	R	R	R	S	R	I	S	R	-	-	-	-	-	-	-	-	-
58	UKM/EC/11	HCTM UKM	R	R	R	S	I	R	I	R	R	R	I	R	I	S	R	-	-	-	-	-	-	-	-	-
59	UKM/EC/12	HCTM UKM	R	R	R	S	I	R	I	R	R	R	I	R	I	S	R	-	-	-	-	-	-	-	-	-
60	UKM/EC/13	HCTM UKM	R	R	R	S	I	R	I	R	R	R	I	R	I	S	R	-	-	-	-	-	-	-	-	-
61	UKM/EC/14	HCTM UKM	R	R	R	S	R	R	S	R	R	R	S	R	S	S	R	-	-	+	-	-	-	-	-	+
62	UKM/EC/15	HCTM UKM	R	R	R	S	S	R	R	R	R	R	I	R	S	S	R	-	-	-	+	-	-	-	-	-
63	UKM/EC/16	HCTM UKM	R	R	S	S	R	R	S	S	R	R	S	R	I	S	R	-	-	+	-	-	-	-	-	-
64	UKM/EC/17	HCTM UKM	R	R	R	S	S	R	S	R	R	R	S	R	S	S	R	-	-	-	-	-	-	-	-	-
65	UKM/EC/18	HCTM UKM	R	R	I	S	R	R	R	R	R	R	S	R	S	S	R	-	-	+	+	-	-	-	-	-
66	UKM/EC/19	HCTM UKM	R	R	S	S	S	R	R	R	R	R	I	R	S	S	R	-	-	-	-	-	-	-	-	-
67	UKM/EC/20	HCTM UKM	R	R	R	S	S	R	R	R	R	R	I	R	S	S	R	-	-	-	+	-	-	-	-	-
68	UKM/EC/21	HCTM UKM	R	R	S	S	I	I	I	S	R	R	S	R	S	S	R	-	-	-	-	-	-	-	-	-
69	UKM/EC/22	HCTM UKM	R	R	S	S	S	S	I	R	R	R	S	R	S	S	R	-	-	-	+	-	-	-	-	-
70	UKM/EC/23	HCTM UKM	R	R	R	S	I	I	S	S	R	R	S	R	S	S	R	-	-	-	-	-	-	-	-	-
71	UKM/EC/24	HCTM UKM	R	R	S	S	S	I	S	R	R	R	S	R	S	S	R	-	-	-	+	-	-	-	-	-
72	UKM/EC/25	HCTM UKM	R	R	S	S	R	I	I	R	R	R	S	R	I	S	R	-	-	-	-	-	-	-	-	-
73	UKM/EC/26	HCTM UKM	R	R	R	S	S	S	S	R	R	R	S	R	S	S	R	-	-	-	+	-	-	-	-	-
74	UKM/EC/28	HCTM UKM	R	R	R	S	S	I	S	R	R	R	S	R	S	S	R	-	-	-	+	-	-	-	-	-
75	UKM/EC/29	HCTM UKM	R	R	S	S	S	R	S	R	R	R	S	R	S	S	R	-	-	-	-	-	-	-	-	-
76	UKM/EC/30	HCTM UKM	R	R	R	S	S	R	S	S	R	R	S	R	S	S	R	-	-	-	-	-	-	-	-	-
77	UKM/EC/31	HCTM UKM	R	R	R	S	S	I	S	R	R	R	S	R	S	S	R	-	-	-	+	-	-	-	-	-
78	UKM/EC/32	HCTM UKM	R	R	R	S	R	R	R	R	R	R	S	R	S	S	R	-	-	+	+	-	-	-	-	+
79	UKM/EC/33	HCTM UKM	R	R	R	S	R	R	R	S	R	R	I	R	R	S	R	-	-	-	-	-	-	-	-	-
80	UM/EC/01	UMMC	R	R	S	S	R	R	R	R	R	R	R	R	S	S	R	-	-	+	-	-	-	-	-	-
81	UM/EC/03	UMMC	R	I	S	S	I	R	I	R	R	R	S	R	S	S	R	-	-	+	+	-	-	-	-	-
82	UM/EC/04	UMMC	R	S	S	S	I	R	I	R	R	R	S	R	S	S	R	-	-	-	+	-	-	-	-	-
83	UM/EC/06	UMMC	R	R	R	S	I	R	S	R	R	R	S	R	S	S	R	-	-	+	-	-	-	-	-	+
84	UM/EC/07	UMMC	R	R	S	S	R	R	S	R	R	R	I	R	S	S	R	-	-	+	-	-	-	-	-	+
85	UM/EC/08	UMMC	R	R	R	S	R	R	S	R	R	R	S	R	S	S	R	-	-	-	+	-	-	-	-	+
86	UM/EC/09	UMMC	R	R	S	S	I	R	S	R	R	R	S	R	S	S	R	-	-	-	+	-	-	-	-	+
87	UM/EC/10	UMMC	R	R	S	S	I	R	S	R	R	R	S	R	S	S	R	-	-	-	+	-	-	-	-	-
88	UM/EC/11	UMMC	R	R	R	S	R	R	I	R	R	R	S	R	S	S	R	-	-	+	-	-	-	-	-	-
89	UM/EC/12	UMMC	R	R	R	S	I	I	S	S	R	R	S	R	S	S	R	-	-	+	-	-	-	-	-	-
90	UM/EC/13	UMMC	R	R	R	S	R	R	I	R	R	R	S	R	S	S	R	-	-	+	+	-	-	-	-	-
91	UM/EC/14	UMMC	R	R	R	S	R	R	R	R	R	R	R	R	I	S	R	-	-	+	+	-	-	-	-	-
92	UM/EC/15	UMMC	R	R	R	S	I	R	S	R	R	R	S	R	S	S	R	-	-	+	-	-	-	-	-	-
93	UM/EC/16	UMMC	R	R	R	S	R	R	R	R	R	R	R	R	I	S	R	-	-	-	+	-	-	-	-	-
94	UM/EC/17	UMMC	R	R	R	S	R	R	S	R	R	R	S	R	S	S	R	-	-	-	+	-	-	-	-	-
95	UM/EC/18	UMMC	R	R	R	S	R	R	R	R	R	R	S	R	S	S	R	-	-	-	-	-	-	-	-	+
96	UM/EC/19	UMMC	R	R	S	S	I	R	R	R	R	R	I	R	S	S	R	-	-	+	+	-	-	-	-	-
97	UM/EC/20	UMMC	R	R	R	S	R	R	R	R	R	R	S	R	S	S	R	-	-	-	+	-	-	-	-	-
98	UM/EC/21	UMMC	R	R	R	S	S	R	S	R	R	R	S	R	S	I	R	-	-	-	+	-	-	-	-	-
99	UM/EC/22	UMMC	R	R	R	S	R	I	R	R	R	R	R	R	I	S	R	-	-	+	-	-	-	-	-	-
100	UM/EC/23	UMMC	R	R	R	S	R	R	R	R	R	R	S	R	S	S	R	-	-	+	+	-	-	-	-	-
101	UM/EC/24	UMMC	R	R	R	S	R	R	I	R	R	R	S	R	S	S	R	-	-	-	+	-	-	-	-	-
102	UM/EC/26	UMMC	R	R	R	S	S	R	S	R	R	R	S	R	S	S	R	-	-	-	-	-	-	-	-	-
103	UM/EC/27	UMMC	R	R	S	S	S	R	I	R	R	R	S	R	S	S	R	-	-	+	+	-	-	-	-	-
104	UM/EC/28	UMMC	R	R	R	S	R	R	I	R	R	R	S	R	S	S	R	-	-	-	+	-	-	-	-	-
105	UM/EC/29	UMMC	R	R	R	S	S	I	S	R	R	R	S	R	R	S	R	-	-	-	-	-	-	-	-	-
106	UM/EC/30	UMMC	R	R	R	S	I	R	S	S	R	R	S	R	R	S	R	-	-	+	-	-	-	-	-	-
107	UM/EC/31	UMMC	R	R	S	S	R	R	R	R	R	R	S	R	R	S	R	-	-	+	-	-	-	-	-	-
108	UM/EC/32	UMMC	R	R	R	S	R	R	R	R	R	R	S	R	S	S	R	-	-	+	-	-	-	-	-	-
109	UM/EC/33	UMMC	S	S	S	S	R	R	I	R	R	R	I	R	S	S	R	-	-	+	+	-	-	-	-	-
110	UM/EC/34	UMMC	R	R	I	S	R	R	S	R	R	R	S	R	S	S	R	-	-	-	+	-	-	-	-	-
111	UM/EC/35	UMMC	R	R	S	S	R	R	S	R	R	R	S	R	S	S	R	-	-	+	-	-	-	-	-	-
112	UM/EC/36	UMMC	R	R	R	S	R	R	S	R	R	R	S	R	I	S	R	-	-	+	+	-	-	-	-	-
113	UM/EC/37	UMMC	R	R	S	S	R	R	S	R	R	R	S	R	S	S	R	-	-	+	+	-	-	-	-	-
114	UM/EC/38	UMMC	R	R	S	S	R	R	R	R	R	R	R	R	R	S	R	-	-	-	+	-	-	-	-	-
115	UM/EC/39	UMMC	R	R	R	S	R	R	S	R	R	R	S	R	S	S	R	-	-	+	-	-	-	-	-	-
116	UM/EC/40	UMMC	R	R	R	S	R	I	S	R	R	R	S	R	S	S	R	-	-	-	-	-	-	-	-	-
117	UM/EC/41	UMMC	R	R	R	S	R	R	I	R	R	R	I	R	S	S	R	-	-	-	-	-	-	-	-	-
118	UM/EC/42	UMMC	R	R	S	S	R	R	I	R	R	R	S	R	S	S	R	-	-	+	+	-	-	-	-	-
119	UM/EC/43	UMMC	R	R	I	S	R	R	I	R	R	R	S	R	S	S	R	-	-	+	-	-	-	-	-	-
120	UM/EC/44	UMMC	R	R	R	S	R	R	I	R	R	R	S	R	S	S	R	-	-	+	-	-	-	-	-	-
121	IMU/EC/01	HK-IMU	R	R	S	S	R	R	R	R	R	R	S	R	S	S	R	-	-	+	+	-	-	-	-	-
122	IMU/EC/02	HK-IMU	R	R	I	S	S	R	I	R	R	R	S	R	S	S	R	-	-	-	+	-	-	-	-	-
123	IMU/EC/03	HK-IMU	R	R	R	S	R	R	I	R	R	R	S	R	S	S	R	-	-	+	+	-	-	-	-	-
124	IMU/EC/04	HK-IMU	R	R	R	S	R	R	S	R	R	R	S	R	S	S	R	-	-	-	+	-	-	-	-	-
125	IMU/EC/05	HK-IMU	R	R	S	S	I	R	S	R	R	R	S	R	S	S	R	-	-	+	+	-	-	-	-	-
126	IMU/EC/06	HK-IMU	R	R	R	S	R	R	R	R	R	R	R	R	S	S	R	-	-	+	+	-	-	-	-	-
127	IMU/EC/07	HK-IMU	R	R	R	S	R	R	S	R	R	R	S	R	I	S	R	-	-	+	+	-	-	-	-	-
