# Supplementary material for: A multicentre study to determine the in vitro efficacy of flomoxef against extended-spectrum beta-lactamase producing Escherichia coli in Malaysia
Source: PeerJ. 2023 Nov 28;11:e16393. doi: 10.7717/peerj.16393 (PMC10691355; doi:10.7717/peerj.16393)
Supplement: Supplemental Information 2 — Numerical values for MIC of each ESBL-EC isolates. [file peerj-11-16393-s002.xlsx]

## Sheet: AST & MIC RESULTS
No.	Strain	CAZ-MIC		CTX-MIC		AMC-MIC		ATM-MIC		FEP-MIC		FOX-MIC		FLO-MIC		IPM-MIC		MEM-MIC		TZP-MIC		SXT-MIC
1	UPM/EC/01	>256	R	>256	R	32	R	>256	R	>256	R	8	S	8	S	2	I	≤0.25	S	64/4	I	>64/1216	R
2	UPM/EC/02	256	R	>256	R	128	R	>256	R	>256	R	128	R	>64	R	4	R	≤0.25	S	128/4	R	>64/1216	R
3	UPM/EC/03	64	R	>256	R	4	S	>256	R	256	R	32	R	2	S	2	I	≤0.25	S	512/4	R	>64/1216	R
4	UPM/EC/04	>256	R	>256	R	64	R	>256	R	>256	R	4	S	2	S	1	S	≤0.25	S	>512/4	R	>64/1216	R
5	UPM/EC/05	8	I	>256	R	32	R	>256	R	256	R	4	S	2	S	2	I	≤0.25	S	256/4	R	>64/1216	R
6	UPM/EC/12	256	R	>256	R	32	R	256	R	>256	R	32	R	2	S	<0.25	S	≤0.25	S	>512/4	R	>64/1216	R
7	UPM/EC/13	>256	R	>256	R	32	R	256	R	>256	R	16	I	2	S	<0.25	S	≤0.25	S	>512/4	R	>64/1216	R
8	USM/EC/01	>256	R	>256	R	16	I	>256	R	>256	R	128	R	16	I	<0.25	S	≤0.25	S	>512/4	R	>64/1216	R
9	USM/EC/02	128	R	>256	R	16	I	>256	R	>256	R	8	S	8	S	2	I	2	I	>512/4	R	>64/1216	R
10	USM/EC/03	2	S	>256	R	128	R	>256	R	256	R	16	I	2	S	0.5	S	≤0.25	S	>512/4	R	>64/1216	R
11	USM/EC/04	>256	R	>256	R	64	R	>256	R	>256	R	16	I	0.25	S	<0.25	S	≤0.25	S	>512/4	R	>64/1216	R
12	USM/EC/05	>256	R	>256	R	64	R	>256	R	>256	R	16	I	0.5	S	2	I	≤0.25	S	>512/4	R	>64/1216	R
13	USM/EC/06	>256	R	>256	R	8	S	>256	R	>256	R	8	S	0.5	S	<0.25	S	≤0.25	S	32/4	I	>64/1216	R
14	USM/EC/07	>256	R	>256	R	16	I	256	R	>256	R	8	S	4	S	<0.25	S	≤0.25	S	>512/4	R	>64/1216	R
15	USM/EC/08	8	I	>256	R	8	S	256	R	>256	R	4	S	4	S	0.5	S	≤0.25	S	>512/4	R	>64/1216	R
16	USM/EC/09	8	I	>256	R	8	S	>256	R	128	R	8	S	0.125	S	<0.25	S	≤0.25	S	512/4	R	>64/1216	R
17	USM/EC/10	>256	R	>256	R	64	R	>256	R	>256	R	8	S	0.5	S	0.5	S	≤0.25	S	>512/4	R	>64/1216	R
18	USM/EC/11	>256	R	>256	R	32	R	>256	R	>256	R	16	I	4	S	<0.25	S	≤0.25	S	>512/4	R	>64/1216	R
19	USM/EC/12	128	R	>256	R	8	S	256	R	>256	R	4	S	0.5	S	≤0.25	S	≤0.25	S	32/4	I	>64/1216	R
20	USM/EC/13	8	I	>256	R	16	I	>256	R	>256	R	4	S	0.25	S	≤0.25	S	≤0.25	S	32/4	I	>64/1216	R
21	USM/EC/14	>256	R	>256	R	16	I	>256	R	>256	R	8	S	4	S	≤0.25	S	≤0.25	S	2020-04-16	S	>64/1216	R
22	USM/EC/15	16	R	>256	R	16	I	>256	R	>256	R	8	S	0.25	S	0.5	S	≤0.25	S	>512/4	R	>64/1216	R
23	USM/EC/16	8	I	>256	R	64	R	>256	R	>256	R	16	I	2	S	1	S	0.5	S	>512/4	R	>64/1216	R
24	USM/EC/17	>256	R	>256	R	16	I	>256	R	>256	R	8	S	0.25	S	≤0.25	S	≤0.25	S	2020-04-16	S	>64/1216	R
25	USM/EC/18	64	R	>256	R	8	S	256	R	>256	R	32	R	0.5	S	≤0.25	S	≤0.25	S	32/4	I	>64/1216	R
26	USM/EC/19	64	R	>256	R	8	S	256	R	>256	R	32	R	0.5	S	≤0.25	S	≤0.25	S	32/4	I	>64/1216	R
27	USM/EC/22	>256	R	>256	R	32	R	256	R	>256	R	32	R	4	S	≤0.25	S	≤0.25	S	>512/4	R	>64/1216	R
28	USM/EC/23	16	R	>256	R	16	I	>256	R	>256	R	128	R	4	S	≤0.25	S	≤0.25	S	>512/4	R	>64/1216	R
29	USM/EC/24	>256	R	>256	R	64	R	>256	R	>256	R	64	R	4	S	≤0.25	S	≤0.25	S	>512/4	R	>64/1216	R
30	USM/EC/25	>256	R	>256	R	32	R	256	R	>256	R	32	R	0.5	S	≤0.25	S	≤0.25	S	>512/4	R	>64/1216	R
31	USM/EC/26	>256	R	>256	R	128	R	256	R	>256	R	32	R	>64	S	0.5	S	≤0.25	S	>512/4	R	>64/1216	R
32	USM/EC/27	>256	R	>256	R	8	S	256	R	>256	R	32	R	0.25	S	≤0.25	S	1	S	32/4	I	>64/1216	R
33	USM/EC/28	32	R	>256	R	32	R	>256	R	>256	R	16	I	2	S	0.5	S	≤0.25	S	>512/4	R	>64/1216	R
34	USM/EC/29	>256	R	>256	R	8	S	>256	R	>256	R	32	R	4	S	≤0.25	S	≤0.25	S	>512/4	R	>64/1216	R
35	USM/EC/30	>256	R	>256	R	16	I	256	R	>256	R	16	I	2	S	≤0.25	S	I	S	64/4	I	>64/1216	R
36	USM/EC/31	64	R	>256	R	8	S	>256	R	>256	R	16	I	0.5	S	≤0.25	S	≤0.25	S	>512/4	R	>64/1216	R
37	USM/EC/32	256	R	>256	R	32	R	256	R	>256	R	4	S	2	S	≤0.25	S	≤0.25	S	64/4	I	>64/1216	R
38	USM/EC/33	2	S	>256	R	8	S	256	R	256	R	4	S	1	S	≤0.25	S	≤0.25	S	64/4	I	>64/1216	R
39	USM/EC/34	>256	R	>256	R	32	R	>256	R	>256	R	64	R	4	S	≤0.25	S	0.5	S	>512/4	R	>64/1216	R
40	USM/EC/35	>256	R	>256	R	8	S	128	R	>256	R	64	R	2	S	≤0.25	S	≤0.25	S	2020-04-16	S	>64/1216	R
41	USM/EC/36	>256	R	>256	R	8	S	>256	R	>256	R	64	R	32	S	≤0.25	S	≤0.25	S	>512/4	R	>64/1216	R
42	USM/EC/37	>256	R	>256	R	128	R	256	R	>256	R	64	R	64	R	1	S	≤0.25	S	>512/4	R	>64/1216	R
43	USM/EC/38	>256	R	>256	R	16	I	>256	R	>256	R	8	S	2	S	≤0.25	S	≤0.25	S	>512/4	R	>64/1216	R
44	USM/EC/39	>256	R	>256	R	32	R	>256	R	>256	R	16	I	8	S	≤0.25	S	≤0.25	S	>512/4	R	>64/1216	R
45	USM/EC/40	>256	R	>256	R	32	R	>256	R	>256	R	8	S	8	S	≤0.25	S	≤0.25	S	>512/4	R	>64/1216	R
46	USM/EC/41	>256	R	>256	R	16	I	>256	R	>256	R	16	I	8	S	≤0.25	S	≤0.25	S	>512/4	R	>64/1216	R
47	USM/EC/42	>256	R	>256	R	8	S	256	R	>256	R	4	S	1	S	≤0.25	S	≤0.25	S	64/4	I	>64/1216	R
48	UKM/EC/01	>256	R	>256	R	64	R	>256	R	>256	R	8	S	8	S	≤0.25	S	0.5	S	>512/4	R	>64/1216	R
49	UKM/EC/02	>256	R	>256	R	32	R	256	R	>256	R	16	I	8	S	1	S	≤0.25	S	>512/4	R	>64/1216	R
50	UKM/EC/03	64	R	>256	R	4	S	128	R	>256	R	8	S	0.25	S	≤0.25	S	≤0.25	S	2020-04-16	S	>64/1216	R
51	UKM/EC/04	2	S	>256	R	16	I	256	R	256	R	16	I	16	I	≤0.25	S	1	S	>512/4	R	>64/1216	R
52	UKM/EC/05	>256	R	>256	R	32	R	>256	R	>256	R	16	I	16	I	≤0.25	S	≤0.25	S	>512/4	R	>64/1216	R
53	UKM/EC/06	>256	R	>256	R	4	S	>256	R	>256	R	4	S	0.5	S	≤0.25	S	≤0.25	S	32/4	I	>64/1216	R
54	UKM/EC/07	64	R	>256	R	16	I	>256	R	>256	R	8	S	32	I	1	S	0.5	S	>512/4	R	>64/1216	R
55	UKM/EC/08	>256	R	>256	R	8	S	>256	R	>256	R	4	S	0.5	S	2	I	1	S	32/4	I	>64/1216	R
56	UKM/EC/09	256	R	>256	R	16	I	>256	R	256	R	4	S	4	S	≤0.25	S	2	I	512/4	R	>64/1216	R
57	UKM/EC/10	128	R	>256	R	16	I	256	R	>256	R	16	I	16	S	2	I	≤0.25	S	>512/4	R	>64/1216	R
58	UKM/EC/11	64	R	>256	R	16	I	256	R	>256	R	16	I	32	I	2	I	≤0.25	S	>512/4	R	>64/1216	R
59	UKM/EC/12	128	R	>256	R	16	I	256	R	>256	R	16	I	32	I	2	I	≤0.25	S	>512/4	R	>64/1216	R
60	UKM/EC/13	128	R	>256	R	16	I	256	R	>256	R	16	I	32	I	2	I	≤0.25	S	>512/4	R	>64/1216	R
61	UKM/EC/14	64	R	>256	R	64	R	>256	R	>256	R	8	S	2	S	≤0.25	S	≤0.25	S	>512/4	R	>64/1216	R
62	UKM/EC/15	>256	R	>256	R	8	S	256	R	>256	R	32	R	16	I	0.5	S	≤0.25	S	>512/4	R	>64/1216	R
63	UKM/EC/16	4	S	>256	R	128	R	256	R	256	R	4	S	0.5	S	2	I	≤0.25	S	>512/4	R	>64/1216	R
64	UKM/EC/17	256	R	>256	R	8	S	>256	R	>256	R	4	S	8	S	≤0.25	S	≤0.25	S	>512/4	R	>64/1216	R
65	UKM/EC/18	>256	R	>256	R	128	R	>256	R	>256	R	32	R	8	S	0.5	S	0.5	S	>512/4	R	64/1216	R
66	UKM/EC/19	256	R	>256	R	8	S	256	R	256	R	64	R	32	I	≤0.25	S	<0.25	S	>512/4	R	>64/1216	R
67	UKM/EC/20	>256	R	>256	R	8	S	256	R	>256	R	32	R	16	I	≤0.25	S	<0.25	S	>512/4	R	>64/1216	R
68	UKM/EC/21	2	S	>256	R	16	I	256	R	>256	R	16	I	1	S	≤0.25	S	<0.25	S	32/4	I	64/1216	R
69	UKM/EC/22	16	R	>256	R	4	S	256	R	256	R	16	I	4	S	≤0.25	S	<0.25	S	2020-04-16	S	>64/1216	R
70	UKM/EC/23	4	S	>256	R	16	I	256	R	>256	R	8	S	0.5	S	0.5	S	0.5	S	32/4	I	64/1216	R
71	UKM/EC/24	32	R	>256	R	8	S	128	R	256	R	8	S	0.25	S	≤0.25	S	0.5	S	32/4	I	>64/1216	R
72	UKM/EC/25	256	R	>256	R	32	R	>256	R	256	R	16	I	4	S	2	I	<0.25	S	32/4	I	>64/1216	R
73	UKM/EC/26	16	R	>256	R	8	S	128	R	256	R	4	S	0.125	S	≤0.25	S	<0.25	S	2020-04-16	S	>64/1216	R
74	UKM/EC/28	>256	R	>256	R	8	S	>256	R	>256	R	8	S	1	S	≤0.25	S	1	S	32/4	I	4/76	R
75	UKM/EC/29	128	R	>256	R	8	S	128	R	>256	R	8	S	4	S	≤0.25	S	<0.25	S	512/4	R	>64/1216	R
76	UKM/EC/30	2	S	>256	R	8	S	128	R	32	R	8	S	8	S	≤0.25	S	<0.25	S	512/4	R	>64/1216	R
77	UKM/EC/31	>256	R	>256	R	8	S	256	R	>256	R	4	S	0.25	S	≤0.25	S	<0.25	S	32/4	I	>64/1216	R
78	UKM/EC/32	>256	R	>256	R	32	R	256	R	>256	R	256	R	1	S	1	S	<0.25	S	>512	R	>64/1216	R
79	UKM/EC/33	2	S	>256	R	32	R	128	R	>256	R	256	R	16	I	4	R	<0.25	S	>512	R	>64/1216	R
80	UM/EC/01	>256	R	>256	R	128	R	>256	R	>256	R	256	R	>64	R	1	S	<0.25	S	>512/4	R	>64/1216	R
81	UM/EC/03	>256	R	>256	R	16	I	256	R	>256	R	16	I	4	S	0.5	S	<0.25	S	>512/4	R	>64/1216	R
82	UM/EC/04	>256	R	>256	R	16	I	256	R	>256	R	16	I	8	S	0.5	S	<0.25	S	>512/4	R	>64/1216	R
83	UM/EC/06	>256	R	>256	R	16	I	256	R	>256	R	8	S	8	S	0.5	S	<0.25	S	>512/4	R	>64/1216	R
84	UM/EC/07	>256	R	>256	R	32	R	256	R	64	R	8	S	32	I	0.5	S	<0.25	S	>512/4	R	>64/1216	R
85	UM/EC/08	>256	R	>256	R	32	R	>256	R	>256	R	8	S	4	S	<0.25	S	<0.25	S	>512/4	R	>64/1216	R
86	UM/EC/09	>256	R	>256	R	16	I	256	R	>256	R	8	S	8	S	0.5	S	<0.25	S	>512/4	R	>64/1216	R
87	UM/EC/10	>256	R	>256	R	16	I	>256	R	>256	R	8	S	0.5	S	<0.25	S	<0.25	S	>512/4	R	>64/1216	R
88	UM/EC/11	256	R	>256	R	32	R	256	R	>256	R	16	I	4	S	0.5	S	<0.25	S	>512/4	R	>64/1216	R
89	UM/EC/12	4	S	>256	R	16	I	256	R	>256	R	4	S	1	S	0.5	S	<0.25	S	64/4	I	>64/1216	R
90	UM/EC/13	>256	R	>256	R	32	R	256	R	>256	R	16	I	8	S	0.5	S	<0.25	S	>512/4	R	>64/1216	R
91	UM/EC/14	>256	R	>256	R	128	R	256	R	>256	R	>256	R	>64	R	2	I	<0.25	S	>512/4	R	>64/1216	R
92	UM/EC/15	16	R	>256	R	16	I	256	R	>256	R	8	S	0.125	S	0.5	S	<0.25	S	>512/4	R	>64/1216	R
93	UM/EC/16	>256	R	>256	R	>256	R	256	R	>256	R	>256	R	>64	R	2	I	<0.25	S	>512/4	R	>64/1216	R
94	UM/EC/17	>256	R	>256	R	32	R	256	R	>256	R	8	S	1	S	0.5	S	<0.25	S	>512/4	R	>64/1216	R
95	UM/EC/18	>256	R	256	R	32	R	256	R	128	R	32	R	0.25	S	<0.25	S	<0.25	S	>512/4	R	>64/1216	R
96	UM/EC/19	>256	R	>256	R	16	I	256	R	>256	R	128	R	32	I	<0.25	S	<0.25	S	>512/4	R	>64/1216	R
97	UM/EC/20	>256	R	>256	R	64	R	256	R	>256	R	32	R	0.25	S	<0.25	S	<0.25	S	>512/4	R	>64/1216	R
98	UM/EC/21	256	R	>256	R	8	S	256	R	>256	R	8	S	0.25	S	<0.25	S	2	I	>512/4	R	>64/1216	R
99	UM/EC/22	256	R	>256	R	>256	R	256	R	>256	R	>256	R	>64	R	2	I	<0.25	S	32/4	I	>64/1216	R
100	UM/EC/23	>256	R	>256	R	32	R	256	R	>256	R	32	R	1	S	<0.25	S	<0.25	S	>512/4	R	>64/1216	R
101	UM/EC/24	>256	R	>256	R	64	R	256	R	>256	R	16	I	4	S	<0.25	S	<0.25	S	>512/4	R	>64/1216	R
102	UM/EC/26	128	R	>256	R	8	S	128	R	>256	R	8	S	0.5	S	0.5	S	<0.25	S	>512/4	R	>64/1216	R
103	UM/EC/27	32	R	>256	R	8	S	128	R	32	R	16	I	0.5	S	<0.25	S	<0.25	S	>512/4	R	>64/1216	R
104	UM/EC/28	64	R	>256	R	32	R	256	R	>256	R	16	I	8	S	0.25	S	<0.25	S	>512/4	R	>64/1216	R
105	UM/EC/29	64	R	>256	R	8	S	256	R	256	R	8	S	8	S	4	R	<0.25	S	64/4	I	>64/1216	R
106	UM/EC/30	2	S	>256	R	16	I	256	R	256	R	8	S	2	S	4	R	<0.25	S	>512/4	R	>64/1216	R
107	UM/EC/31	256	R	>256	R	32	R	256	R	256	R	32	R	8	S	4	R	<0.25	S	>512/4	R	>64/1216	R
108	UM/EC/32	256	R	>256	R	32	R	256	R	256	R	32	R	2	S	<0.25	S	<0.25	S	>512/4	R	>64/1216	R
109	UM/EC/33	256	R	>256	R	32	R	256	R	256	R	16	I	16	I	0.5	S	<0.25	S	>512/4	R	>64/1216	R
110	UM/EC/34	256	R	>256	R	32	R	256	R	256	R	8	S	8	S	0.5	S	<0.25	S	>512/4	R	>64/1216	R
111	UM/EC/35	256	R	>256	R	32	R	>256	R	256	R	8	S	8	S	1	S	<0.25	S	>512/4	R	>64/1216	R
112	UM/EC/36	256	R	>256	R	32	R	256	R	256	R	8	S	8	S	2	I	<0.25	S	>512/4	R	>64/1216	R
113	UM/EC/37	256	R	>256	R	32	R	256	R	256	R	8	S	4	S	1	S	<0.25	S	>512/4	R	>64/1216	R
114	UM/EC/38	>256	R	>256	R	32	R	256	R	256	R	64	R	>64	R	4	R	<0.25	S	>512/4	R	>64/1216	R
115	UM/EC/39	256	R	>256	R	64	R	256	R	256	R	8	S	4	S	0.5	S	<0.25	S	>512/4	R	>64/1216	R
116	UM/EC/40	>256	R	>256	R	64	R	256	R	256	R	8	S	0.5	S	0.5	S	<0.25	S	32/4	I	>64/1216	R
117	UM/EC/41	256	R	>256	R	32	R	256	R	256	R	16	I	16	I	1	S	<0.25	S	>512/4	R	>64/1216	R
118	UM/EC/42	256	R	>256	R	32	R	256	R	256	R	16	I	1	S	1	S	<0.25	S	>512/4	R	>64/1216	R
119	UM/EC/43	256	R	>256	R	32	R	256	R	256	R	16	I	1	S	0.5	S	<0.25	S	>512/4	R	>64/1216	R
120	UM/EC/44	256	R	>256	R	32	R	256	R	256	R	16	I	2	S	1	S	<0.25	S	>512/4	R	>64/1216	R
121	IMU/EC/01	256	R	>256	R	32	R	>256	R	>256	R	32	R	1	S	0.5	S	1	S	>512/4	R	>64/1216	R
122	IMU/EC/02	256	R	>256	R	8	S	>256	R	>256	R	16	I	2	S	0.5	S	1	S	256/4	R	>64/1216	R
123	IMU/EC/03	>256	R	>256	R	64	R	>256	R	>256	R	16	I	2	S	0.5	S	≤0.25	S	>512/4	R	>64/1216	R
124	IMU/EC/04	>256	R	>256	R	128	R	256	R	>256	R	8	S	0.5	S	<0.25	S	≤0.25	S	>512/4	R	>64/1216	R
125	IMU/EC/05	>256	R	>256	R	16	I	>256	R	>256	R	4	S	4	S	0.5	S	≤0.25	S	512/4	R	>64/1216	R
126	IMU/EC/06	>256	R	>256	R	128	R	256	R	>256	R	64	R	>64	R	<0.25	S	≤0.25	S	>512/4	R	>64/1216	R
127	IMU/EC/07	>256	R	>256	R	64	R	256	R	>256	R	8	S	8	S	2	I	≤0.25	S	>512/4	R	>64/1216	R
